# Supplementary figures and images for: Pyrroloquinoline quinone extendsCaenorhabditis elegans’ longevity through the insulin/IGF1 signaling pathway-mediated activation of autophagy
Source: Royal Society of Chemistry journal article supplement (doi:10.1039/d1fo02128a), 2021-01-01

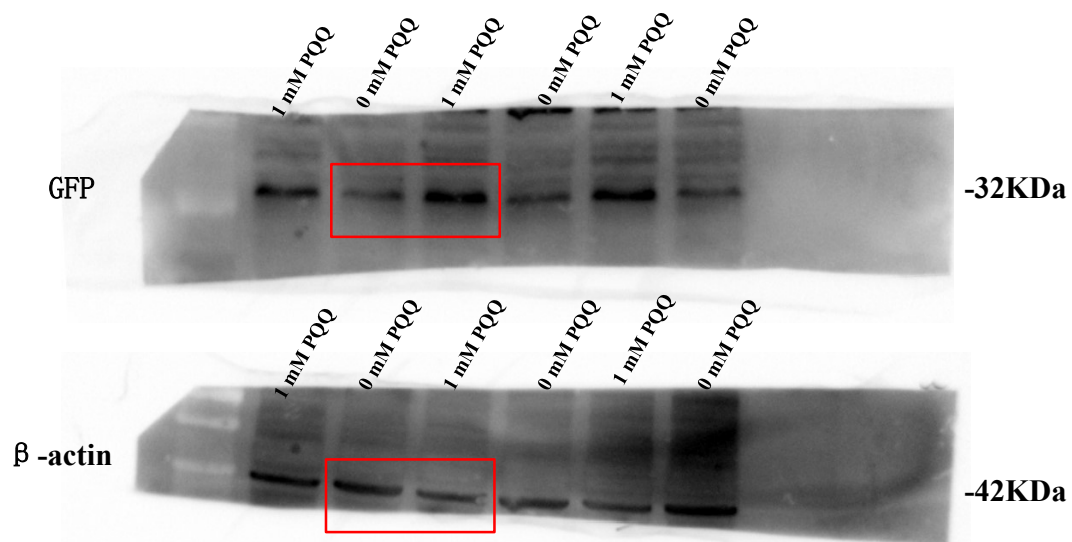

**Supplementary Fig. S1 Full-length blots for western blots shown in Fig. 6E**

Supplement: d1fo02128a1.pdf [file d1fo02128a1.pdf]
